# Supplementary material for: Controlling Optical and Catalytic Activity of Genetically Engineered Proteins by Ultrasound
Source: PubMed Central journal article supplement — Angew Chem Int Ed Engl. 2020 Nov 13;60(3):1493–7. doi: 10.1002/anie.202010324 (PMC7839785; doi:10.1002/anie.202010324), 2020-11-13
Supplement: ANIE-60-1493-s001.pdf [file ANIE-60-1493-s001.pdf]

Supporting Information

**Controlling Optical and Catalytic Activity of Genetically Engineered Proteins by Ultrasound**

*Yu Zhou, Shuaidong Huo, Mark Loznik, Robert Göstl, Arnold J. Boersma, and Andreas Herrmann\**

anie\_202010324\_sm\_miscellaneous\_information.pdf

## Table of Contents

|                               |     |
|-------------------------------|-----|
| Table of Contents .....       | S2  |
| Experimental Procedures ..... | S3  |
| Results and Discussion .....  | S7  |
| References .....              | S23 |
| Author Contributions .....    | S23 |

## Experimental Procedures

### Chemicals

All chemical reagents were of analytical grade and used without further purification. Tryptone and yeast extract used for Terrific Broth (TB) medium were purchased from Duchefa. T4 DNA ligase (5 Weiss U/ $\mu$ L) was purchased from Thermo Fisher Scientific. Roti@GelStain was received from Carl Roth (Germany). The other chemicals were purchased from Sigma Aldrich unless otherwise noted. Ultrapure water with a resistivity > 18.2 M $\Omega$ -cm was used for all experiments.

### Molecular cloning

Circular permuted GFP (Fig. S1) and BPTI backbone fragments (Fig. S14) with the recognition sites of the restriction enzymes PflMI and BglI were ordered (IDT). The fragments were ligated to pJET 1.2 blunt vector using T4 DNA ligase according to the Blunt-end ligation protocol; the DNA fragment was used in a 3:1 molar ratio with pJET1.2/blunt vector, and the ligation mixture was transformed directly after 5 min at 22 °C incubation. Because BglI is used in further cloning, the present BglI site on the pJET vector was removed using the primers FW: 5'-CGC CGA GCG CAG AAG TGG TC-3' and RV: 5'-CTG CCG GCT GGC TGG TTT ATT G-3'. We constructed pJET-CpGFP and pJET-SumoBPTI in this manner.

The building block of the anionic ELP gene (E36) and neutral ELP gene (V40) on PUC19 was constructed previously by our group.<sup>[1]</sup> The recognition sites of the restriction enzymes PflMI and BglI were preserved by incorporating one valine instead of a glutamic acid residue per ten pentapeptide repeats. The ELP gene was cut from the PUC19 vector by digestion with PflMI and BglI and run on a 1% agarose gel in TAE buffer. The band containing the ELP gene was excised from the gel and purified using a spin column purification kit (General Electric). pJET with target fragments were also digested with PflMI and BglI and dephosphorylated with Fast AP. The vectors were purified by 1% agarose gel extraction. The linearized pJET vectors and the ELP-encoding gene were ligated using T4 ligase with a molar ratio 1:3 and transformed into chemically competent DH5 $\alpha$  cells. Cells were plated and colonies were picked and grown in LB medium supplemented with 100  $\mu$ g/mL carbenicillin overnight, and plasmids were isolated using the GeneJET Plasmid Miniprep kit. Positive clones were verified by analytical digest with PflMI and BglI following gel electrophoresis. The DNA sequences of the inserts were verified by DNA sequencing (Microsynth Sequencing AG). Gene oligomerization was performed as described by Chilkoti and co-workers.<sup>[2]</sup> Finally, the gene fragments encoding the ELP fusion proteins were transferred into the expression vector pET25b(+) for protein expression.

### Protein expression and purification

*E. coli* BLR(DE3) cells (Novagen) were chosen as expression strains because this strain stabilizes plasmids with repetitive sequences.<sup>[3]</sup> For protein production, overnight culture was diluted 1/100 in TB medium supplemented with 100  $\mu$ g/mL carbenicillin and incubated at 37°C shaking at 200 rpm until OD<sub>600</sub> 0.8-1.0. Protein production was initiated with 1 mM IPTG at 22°C for GFPs and 30 °C for BPTIs for at least 16h. Cells were subsequently harvested by centrifugation (6,000 $\times$ g, 20 min, 4°C), resuspended in lysis buffer (50 mM sodium phosphate buffer, pH 8.0, 300 mM NaCl, 20 mM imidazole, 0.5 mM PMSF, 10  $\mu$ g/ml DNaseI) and disrupted by high pressure homogenizer (Constant Systems Ltd Muti-Shot). Insoluble cell debris was removed by centrifugation (15,000 $\times$ g, 30 min, 4 °C). Proteins were purified from the supernatant under native conditions by Ni-sepharose chromatography: Supernatant was filtered using a 0.22  $\mu$ m pore size membrane filter (Millipore Corp.), and loaded onto a Histrap fast flow column (General Electric), pre-equilibrated with His-binding buffer (50 mM Phosphate Buffer, 500 mM NaCl, 20 mM Imidazole, pH=7.4). Next, 5-8 column volumes of His-washing buffer (50 mM Phosphate Buffer, 500 mM NaCl, 50 mM imidazole, pH=7.4) was added to remove impurities, after which 3 column volumes of His-elution buffer (50 mM phosphate buffer, 500 mM NaCl, 500 mM imidazole, pH=7.4) was used to collect the target protein. The product was further purified by ion exchange chromatography (Q HP column for glutamic acid containing SUPs; heparin HP column for lysine containing SUPs). To this end, the product was 10 times diluted with 50 mM Phosphate Buffer (pH=8) and loaded onto a pre-equilibrated (IEC A buffer: 50 mM Phosphate Buffer, 20 mM NaCl, pH=8) ion exchange column. The supercharged target protein was purified with a 10 column volumes gradient elution program from 100% IEC A buffer to 100% IEC B (50 mM Phosphate Buffer, 2 M NaCl, pH=8) buffer with a flow speed of 0.5 ml/min. We collected the first fraction with supercharged GFP for our experiments, which gave good spectral properties. The concentrations of the purified ELP fusion proteins were determined by absorbance at 280 nm using a Microplate Reader Spectrophotometer (Molecular Devices SpectraMax M3). Protein purity was determined on a 15% SDS-PAGE stained with Coomassie staining solution (40% methanol, 10% glacial acetic acid, 1 g/L Brilliant Blue R250), and analyzed with ImageJ software. Photographs of the gels were taken with Bio-Rad gel imager (E-box, Vilber).

### Protein Cleavage

To determine the influence of the SUMO-tag on the binding affinity between trypsin and BPTI and its role in protein sensitivity with ultrasound, SUMO protease (Sigma) was used to cleave the SUMO-tag. 20 units of SUMO protease was used per mg of target protein for 1 hour at 30 °C or overnight at 2–8°C. Products were purified by Ni-NTA. The reaction mixture was loaded onto a Histrap fast flow column (General Electric) pre-equilibrated with the His-binding buffer (50 mM phosphate buffer, 500 mM NaCl, 20 mM imidazole, pH=7.4). 2-3 column volumes of His-binding buffer were used to collect BPTIs, which did not contain a His tag after reaction. The SUMO and SUMO protease have a His-tag and remain on the column.

### Optical Spectroscopy

A Microplate Reader Spectrophotometer (Molecular Devices SpectraMax M3) was used for all absorbance and fluorescence measurements at room temperature in PBS buffer (pH=7.4), and protein concentrations were in the 10  $\mu$ M range.

The CD spectra were obtained using a J-1500 CD Spectrometer (JASCO), and protein concentrations were in the 10  $\mu$ M range. The following parameters were used: CD scale 200 mdeg/1.0 dOD, D.I.T. 2 sec, Bandwidth 1 nm.

## Sonication

A QSonica sonicator (20 kHz) was used in this study. The 422-A probe (50% amplitude) was used for all sonication experiments. The program was a loop with 2 s “on” following 1 s “off”. Everything used for sonication was pre-cooled on ice and the 1.5 mL Eppendorf tubes containing 500  $\mu$ L of the samples were placed in ice-water bathed steel container during sonication.

## ITC measurements

ITC measurements were carried out on a MicroCal PEAQ-ITC (Malvern) at 25 °C. Protein samples were dissolved in PBS (pH = 7.4). Trypsin (Sigma) was then dissolved using the 1xPBS buffer. All solutions were degassed before titrations were performed. The sample cell was filled with 180  $\mu$ L trypsin (10  $\mu$ M), and the syringe was filled with 40  $\mu$ L BPTI (100  $\mu$ M). During each experiment, 0.4  $\mu$ L BPTI was first injected into the sample cell, followed by 19 injections of 2  $\mu$ L BPTI at intervals of 60 s. To subtract the heat of the dilution, the ITC buffer was injected into the protein solution under the same conditions. The raw titration data were analyzed using the device attached software. The calculated  $K_D$  value was the average of triplicate measurements.

## Dynamic light scattering (DLS)

DLS (Fig. S2) was conducted with a Zetasizer Ultra (Malvern) operating with a Multi-Angle Dynamic Light Scattering method at 25 °C. Samples were filtered (0.22  $\mu$ m pore size, Millipore Corp.) before analysis.

## Enzymatic assay of trypsin

Trypsin activity was determined by using *N* $\alpha$ -Benzoyl-L-arginine ethyl ester (BAEE) as the substrate. BAEE can be digested into *N* $\alpha$ -Benzoyl-L-arginine, which has a specific absorbance at 253 nm. By recording the increase at this wavelength, the enzymatic kinetics were determined. For this purpose, 3.13 mL substrate solution with 0.23 mM BAEE and 0.031-0.063 mM hydrochloric acid in PBS buffer (pH = 7.6) were prepared and equilibrated to 25 °C. Then, 10  $\mu$ L of 43  $\mu$ M trypsin and 65  $\mu$ L of 26.5  $\mu$ M BPTI inhibitors were mixed and incubated for 10 min to form the deactivated trypsin/BPTI complex. To this solution, 425  $\mu$ L substrate solution was added, and the mixture was subjected to sonication for a given time. After 10 s of lag time after sonication, the mixture (0.5 mL) was added to the residual 2.7 mL substrate solution to reach a final reaction volume of 3.2 mL. Finally, the absorbance at 253 nm of the reaction mixture was recorded for 10 min. From this measurement, the linear absorbance increase ( $\Delta A_{253}/\text{min}$ ) in the first minute period was obtained and further used to calculate the specific activity of trypsin.

## Protein Sequences

GFP sequence used in this study was from Superfolder GFP.<sup>[4]</sup> The BPTI sequence used was from aprotinin.<sup>[5]</sup>

GFP-GS(GFP11-GS-GFP1-10)

MHHHHHHMRDHMVLHEYVNAAGITHGMD~~E~~LYKGGGSGGGSHGRPGGGSGGSSMSKGEELFTGVVPILVELDGDVNGHKFSVRGEGEGDATIGKLT~~L~~KFICTTGKLPVPWPTLVTTFSYGVQCFSRYPDHMKQHDFFKSAMPEGYVQERTIFFKDDGKYKTRAVVKFEGD~~T~~LVNRIELKGTDFKEDGNILGHKLEYNFN~~S~~HNVYIMADKQKNGIKVNFTVRHNVEDG~~S~~VQLADHYQQNTPIGDGPVLLPDNHYLSTQTVLSKDPNEK

GFP-E36(GFP11-E36-GFP1-10)

MHHHHHHMRDHMVLHEYVNAAGITHGMD~~E~~LYKGGGSGGGSHGVG[(VPGEG)<sub>9</sub>(VPGVG)]<sub>3</sub>(VPGEG)<sub>9</sub>VPGRPGGGSGGSSMSKGEELFTGVVPILVELDGDVNGHKFSVRGEGEGDATIGKLT~~L~~KFICTTGKLPVPWPTLVTTFSYGVQCFSRYPDHMKQHDFFKSAMPEGYVQERTIFFKDDGKYKTRAVVKFEGD~~T~~LVNRIELKGTDFKEDGNILGHKLEYNFN~~S~~HNVYIMADKQKNGIKVNFTVRHNVEDG~~S~~VQLADHYQQNTPIGDGPVLLPDNHYLSTQTVLSKDPNEK

GFP-E72(GFP11-E72-GFP1-10)

MHHHHHHMRDHMVLHEYVNAAGITHGMD~~E~~LYKGGGSGGGSHGVG[(VPGEG)<sub>9</sub>(VPGVG)]<sub>7</sub>(VPGEG)<sub>9</sub>VPGRPGGGSGGSSMSKGEELFTGVVPILVELDGDVNGHKFSVRGEGEGDATIGKLT~~L~~KFICTTGKLPVPWPTLVTTFSYGVQCFSRYPDHMKQHDFFKSAMPEGYVQERTIFFKDDGKYKTRAVVKFEGD~~T~~LVNRIELKGTDFKEDGNILGHKLEYNFN~~S~~HNVYIMADKQKNGIKVNFTVRHNVEDG~~S~~VQLADHYQQNTPIGDGPVLLPDNHYLSTQTVLSKDPNEK

GFP-V40(GFP11-V40-GFP1-10)

MHHHHHHMRDHMVLHEYVNAAGITHGMD~~E~~LYKGGGSGGGSHGVG(VPGVG)<sub>39</sub>VPGRPGGGSGGSSMSKGEELFTGVVPILVELDGDVNGHKFSVRGEGEGDATIGKLT~~L~~KFICTTGKLPVPWPTLVTTFSYGVQCFSRYPDHMKQHDFFKSAMPEGYVQERTIFFKDDGKYKTRAVVKFEGD~~T~~LVNRIELKGTDFKEDGNILGHKLEYNFN~~S~~HNVYIMADKQKNGIKVNFTVRHNVEDG~~S~~VQLADHYQQNTPIGDGPVLLPDNHYLSTQTVLSKDPNEK

Sumo-BPTI

MHHHHHHMSDSEVNQEAKPEVKPEVKPETHINLKVSDGSSEIFFKIKKTTPLRRLMEAFKRQKEMDSLRFYDGIQADQTPEDLDMEDNDIIEAHREQIGGGGSRPDFCLEPPYTGPCKARIIRYFYNAGLCQTFVYGGCRAKRNNFKSAEDCMRTCGGAGGGSHGVGRKRGKWPGRP

Sumo-BPTI-K36

MHHHHHHMSDSEVNQEAKPEVKPEVKPETHINLKVSDGSSEIFFKIKKTTPLRRLMEAFKRQKEMDSLRFlyDGIRIQADQTPEDLD  
MEDNDIIEAHREQIGGGSSRPDFCLLEPPYTGPCKARIIRYFYNAKAGLCQTFVYGGCRAKRNNFKSAEDCMRTCGGAGGGSHGVG[(  
VPGKG)<sub>9</sub>(VPGVG)]<sub>3</sub>(VPGKG)<sub>9</sub>VPGRP

DNA sequence

GFP-GS(GFP11-GS-GFP1-10)

ATGCACCATCACCACCACCACATGCGCGATCACATGGTACTTCACGAATACGTCAACGCAGCAGGTATCACTCACGGGATGGAC  
GAACTGTATAAAGGAGGTGGAAGCGGAGGCGGTTCCACGGCCGGCCAGGGGAGGTTACAGGTGGCGGTTCTATGTCCAAAG  
GGGAAGAGTTATTACTGGTGTGTGCCGATCTTGGTTGAGCTTGATGGTGATGTAAACGGTCATAAATTTCCGTGCGCGGTGA  
AGGCGAGGGTGACGCGACTATCGGAAAATTGACCTTGAAGTTCATTTGCACCACGGGAAAGTTACCCGTCCCTTGGCCACATT  
AGTGACGACATTTAGCTACGGGGTCCAGTGTTCGCGCTACCCGGACCACATGAAGCAGCAGCATTTCTTCAAGTCAGCGAT  
GCCCCGAGGGCTATGTACAGGAGCGTACTATCTTCTTAAGGACGACGGCAAGTATAAGACTCGTGCAGTTGTAATAATTTGAGGG  
GGATACCTTGGTCAATCGTATCGAGCTTAAAGGTACCGATTTTAAAGAAGATGGAATATTCTTGGACACAACTTGAATACAAC  
TTAACTCCATAATGTATATATCATGGCTGATAAACAGAAAAACGGGATCAAAGTCAACTTCACGGTACGTACACAACGTAGAGGAT  
GGTCCGTTACAGTTAGCGGACCATTATCAACAGAATACTCCATTGGTGATGGCCCCGTTCTGTTACCTGACAACCACTATCTGT  
CAACTCAGACAGTATTGTCCAAGGACCCGAATGAGAAA

GFP-E36(GFP11-E36-GFP1-10)

ATGCACCATCACCACCACCACATGCGCGATCACATGGTACTTCACGAATACGTCAACGCAGCAGGTATCACTCACGGGATGGAC  
GAACTGTATAAAGGAGGTGGAAGCGGAGGCGGTTCCACGGCGTGGGTGTTCCGGGTGAAGGTGTTCCGGGCGAAGGTGTGC  
CAGGCGAAGGTGTTCCGGGTGAAGGTGTGCCGGGTGAAGGCGTACCGGGTGAAGGCGTACCAGGCGAAGGTGTTCCGGGTGA  
AGGCGTACCAGGTGAAGGTGTGCCGGGCGTGGGTGTTCCGGGTGAAGGTGTTCCGGGCGAAGGTGTGCCAGGCGAAGGTGTT  
CCGGGTGAAGGTGTGCCGGGTGAAGGCGTACCGGGTGAAGGCGTACCAGGCGAAGGTGTTCCGGGTGAAGGCGTACCAGGT  
GAAGGTGTGCCGGGCGTGGGTGTTCCGGGTGAAGGTGTTCCGGGCGAAGGTGTGCCAGGCGAAGGTGTTCCGGGTGAAGGTG  
TGCCGGGTGAAGGCGTACCGGGTGAAGGCGTACCAGGCGAAGGTGTTCCGGGTGAAGGCGTACCAGGTGAAGGTGTGCCGG  
GCGTGGGTGTTCCGGGTGAAGGTGTTCCGGGCGAAGGTGTGCCAGGCGAAGGTGTTCCGGGTGAAGGTGTGCCGGGTGAAGG  
CGTACCGGGTGAAGGCGTACCAGGCGAAGGTGTTCCGGGTGAAGGCGTACCAGGTGAAGGTGTGCCGGGCCGGCCAGGGGG  
AGGTTACAGGTGGCGGTTCTATGTCCAAAGGGGAAGAGTTATTTACTGGTGTGTGCCGATCTTGGTTGAGCTTGATGGTGATGT  
AAACGGTCATAAATTTCCGTGCGCGGTGAAGGCGAGGGTGACGCGACTATCGGAAAATTGACCTTGAAGTTCATTTGCACCAC  
GGGAAAGTTACCCGTCCCTTGGCCACATTAGTGACGACATTTAGCTACGGGGTCCAGTGTTCGCGCTACCCGGACCACAT  
GAAGCAGCAGCATTTCTTCAAGTCAGCGATGCCGAGGGCTATGTACAGGAGCGTACTATCTTCTTAAGGACGACGGCAAGTA  
TAAGACTCGTGCAGTTGTAATAATTTGAGGGGGATACCTTGGTCAATCGTATCGAGCTTAAAGGTACCGATTTTAAAGAAGATGGA  
AATATTCTTGGACACAACTTGAATACAACTTAACTCCATAATGTATATATCATGGCTGATAAACAGAAAAACGGGATCAAAGTC  
AACTTCACGGTACGTACACAACGTAGAGGATGGTCCGTTACAGTTAGCGGACCATTATCAACAGAATACTCCATTGGTGATGGCC  
CCGTTCTGTTACCTGACAACCACTATCTGTCAACTCAGACAGTATTGTCCAAGGACCCGAATGAGAAA

GFP-E72(GFP11-E72-GFP1-10)

ATGCACCATCACCACCACCACATGCGCGATCACATGGTACTTCACGAATACGTCAACGCAGCAGGTATCACTCACGGGATGGAC  
GAACTGTATAAAGGAGGTGGAAGCGGAGGCGGTTCCACGGCGTGGGTGTTCCGGGTGAAGGTGTTCCGGGCGAAGGTGTGC  
CAGGCGAAGGTGTTCCGGGTGAAGGTGTGCCGGGTGAAGGCGTACCGGGTGAAGGCGTACCAGGCGAAGGTGTTCCGGGTGA  
AGGCGTACCAGGTGAAGGTGTGCCGGGCGTGGGTGTTCCGGGTGAAGGTGTTCCGGGCGAAGGTGTGCCAGGCGAAGGTGTT  
CCGGGTGAAGGTGTGCCGGGTGAAGGCGTACCGGGTGAAGGCGTACCAGGCGAAGGTGTTCCGGGTGAAGGCGTACCAGGT  
GAAGGTGTGCCGGGCGTGGGTGTTCCGGGTGAAGGTGTTCCGGGCGAAGGTGTGCCAGGCGAAGGTGTTCCGGGTGAAGGTG  
TGCCGGGTGAAGGCGTACCGGGTGAAGGCGTACCAGGCGAAGGTGTTCCGGGTGAAGGCGTACCAGGTGAAGGTGTGCCGG  
GCGTGGGTGTTCCGGGTGAAGGTGTTCCGGGCGAAGGTGTGCCAGGCGAAGGTGTTCCGGGTGAAGGTGTGCCGGGTGAAGG  
CGTACCGGGTGAAGGCGTACCAGGCGAAGGTGTTCCGGGTGAAGGCGTACCAGGTGAAGGTGTGCCGGGCGTGGGTGTTCCG  
GGTGAAGGTGTTCCGGGCGAAGGTGTGCCAGGCGAAGGTGTTCCGGGTGAAGGTGTGCCGGGTGAAGGCGTACCGGGTGAAG  
GCGTACCAGGCGAAGGTGTTCCGGGTGAAGGCGTACCAGGTGAAGGTGTGCCGGGCGTGGGTGTTCCGGGTGAAGGTGTTCC  
GGGCGAAGGTGTGCCAGGCGAAGGTGTTCCGGGTGAAGGTGTGCCGGGTGAAGGCGTACCGGGTGAAGGCGTACCAGGCGA  
AGGTGTTCCGGGTGAAGGCGTACCAGGTGAAGGTGTGCCGGGCGTGGGTGTTCCGGGTGAAGGTGTTCCGGGCGAAGGTGTG

CCAGGCGAAGGTGTTCCGGGTGAAGGTGTGCCGGGTGAAGGCGTACCGGGTGAAGGCGTACCAGGCGAAGGTGTTCCGGGTG  
AAGGCGTACCAGGTGAAGGTGTGCCGGGCGTGGGTGTTCCGGGTGAAGGTGTTCCGGGCGAAGGTGTGCCAGGCGAAGGTGT  
TCCGGGTGAAGGTGTGCCGGGTGAAGGCGTACCGGGTGAAGGCGTACCAGGCGAAGGTGTTCCGGGTGAAGGCGTACCAGGT  
GAAGGTGTGCCGGGCCCGCCAGGGGGAGGTTCAAGTGGCGGTTCTATGTCCAAAGGGGAAGAGTTATTCCTGTTGTGCC  
GATCTTGGTTGAGCTTGTGGTGTGTAACGGTCATAAATTTCCGTGCGCGGTGAAGGCGAGGGTGACGCGACTATCGGAAA  
ATTGACCTTGAAGTTCATTTGCACCACGGGAAAGTTACCCGTCCCTTGGCCACATTAGTGACGACATTTAGCTACGGGGTCCAG  
TGTTTTTCGCGCTACCCGGACCACATGAAGCAGCACGATTTCTTCAAGTCAGCGATGCCCGAGGGCTATGTACAGGAGCGTACT  
ATCTTCTTTAAGGACGACGGCAAGTATAAGACTCGTGCAAGTTGAAAATTTGAGGGGGATACCTTGGTCAATCGTATCGAGCTTA  
AAGGTACCGATTTTAAAGAAGATGGAATATTCTTGGACACAACTTGAATACAACCTTAACTCCCATAATGTATATATCATGGCTG  
ATAAACAGAAAAACGGGATCAAAGTCAACTTCACGGTACGTCACAACGTAGAGGATGGTTCCGTTCAAGTTAGCGGACCATTATCA  
ACAGAATACTCCCATTGGTGTATGGCCCCGTTCTGTACCTGACAACCACTATCTGTCAACTCAGACAGTATTGTCCAAGGACCCG  
AATGAGAAA

GFP-V40(GFP11-V40-GFP1-10)

ATGCACCATCACCACCACCACATGCGCGATCACATGGTACTTCACGAATACGTCAACGCAGCAGGTATCACTCACGGGATGGAC  
GAACTGTATAAAGGAGGTGGAAGCGGAGGCGGTTCCACGGCGTGGGTGTTCCGGGTGTCGGTGTCCGGGCGTGGTGTGC  
CAGGCGTGGTGTCCGGGTGTCGGTGTGCCGGGTGTCGGCGTACCAGGCGTGGCGTACCAGGCGTGGTGTCCGGGTGT  
CGGCGTACCAGGTGTCGGTGTGCCGGGCGTGGGTGTTCCGGGTGTCGGTGTCCGGGCGTGGTGTGCCAGGCGTGGTGT  
CCGGGTGTCGGTGTGCCGGGTGTCGGCGTACCAGGCGTGGCGTACCAGGCGTGGTGTCCGGGTGTCGGCGTACCAGGT  
GTCGGTGTGCCGGGCGTGGGTGTTCCGGGTGTCGGTGTCCGGGCGTGGTGTGCCAGGCGTGGTGTCCGGGTGTCGGT  
TGCCGGGTGTCGGCGTACCAGGCGTGGCGTACCAGGCGTGGTGTCCGGGTGTCGGCGTACCAGGTGTCGGTGTGCCG  
GCGTGGGTGTTCCGGGTGTCGGTGTCCGGGCGTGGTGTGCCAGGCGTGGTGTCCGGGTGTCGGTGTGCCGGGTGTCGG  
CGTACCAGGCGTGGCGTACCAGGCGTGGTGTCCGGGTGTCGGCGTACCAGGTGTCGGTGTGCCGGGCCGGCCAGGGGG  
AGGTTCAAGGTGGCGGTTCTATGTCCAAAGGGGAAGAGTTATTCCTGTTGTGCCGATCTTGGTTGAGCTTGTGGTGTAT  
AAACGGTCATAAATTTCCGTGCGCGGTGAAGGCGAGGGTGACGCGACTATCGGAAAATTGACCTTGAAGTTCATTTGCACCAC  
GGGAAAGTTACCCGTCCCTTGGCCACATTAGTGACGACATTTAGCTACGGGGTCCAGTGTTCGCGCTACCCGGACCACAT  
GAAGCAGCACGATTTCTTCAAGTCAGCGATGCCCGAGGGCTATGTACAGGAGCGTACTATCTTCTTTAAGGACGACGGCAAGTA  
TAAGACTCGTGCAGTTGAAAATTTGAGGGGGATACCTTGGTCAATCGTATCGAGCTTAAAGGTACCGATTTTAAAGAAGATGGA  
AATATTCTTGGACACAACTTGAATACAACCTTAACTCCCATAATGTATATATCATGGCTGATAAACAGAAAAACGGGATCAAAGTC  
AACTTCACGGTACGTCACAACGTAGAGGATGGTCCGTTCAAGTTAGCGGACCATTATCAACAGAATACTCCCATTGGTGTATGGCC  
CCGTTCTGTTACCTGACAACCACTATCTGTCAACTCAGACAGTATTGTCCAAGGACCCGAATGAGAAA

Sumo-BPTI

ATGCACCATCATCATCATATGTCCGACTCAGAAGTCAATCAAGAAGCTAAGCCAGAGGTCAAGCCAGAAGTCAAGCCTGAGA  
CTCACATCAATTTAAAGGTGTCCGATGGATCTTCAGAGATCTTCTTCAAGATCAAAAAGACCACTCCTTTAAGAAGGCTGATGGAA  
GCGTTCCGCTAAAAGACAGGGTAAGGAAATGGACTCCTTAAGATTCTTGTACGACGGTATTAGAATTCAAGCTGATCAGACCCCTG  
AAGATTTGGACATGGAGGATAACGATATTATTGAGGCTCACAGAGAACAGATTGGTGGTGGAGGTGGAAGCCGTCCGGATTTT  
GCCTGGAACCGCCATATACCGGTCCGTGTAAAGCACGCATTATCCGCTACTTCTATAACGCGAAAAGCCGGTCTGTGCCAGACGT  
TTGTGTATGGCGTTGCCGTGCGAAGCGCAATAAATTCAAAGCGCGGAAGATTGTATGCGTACCTGCGGTGGCGCAGGAGGT  
GGAAGCCACGGCGTGGGGAGGAAGCGGGGGAAGTGGCCAGGCCGGCCA

Sumo-BPTI-K36

ATGCACCATCATCATCATATGTCCGACTCAGAAGTCAATCAAGAAGCTAAGCCAGAGGTCAAGCCAGAAGTCAAGCCTGAGA  
CTCACATCAATTTAAAGGTGTCCGATGGATCTTCAGAGATCTTCTTCAAGATCAAAAAGACCACTCCTTTAAGAAGGCTGATGGAA  
GCGTTCCGCTAAAAGACAGGGTAAGGAAATGGACTCCTTAAGATTCTTGTACGACGGTATTAGAATTCAAGCTGATCAGACCCCTG  
AAGATTTGGACATGGAGGATAACGATATTATTGAGGCTCACAGAGAACAGATTGGTGGTGGAGGTGGAAGCCGTCCGGATTTT  
GCCTGGAACCGCCATATACCGGTCCGTGTAAAGCACGCATTATCCGCTACTTCTATAACGCGAAAAGCCGGTCTGTGCCAGACGT  
TTGTGTATGGCGTTGCCGTGCGAAGCGCAATAAATTCAAAGCGCGGAAGATTGTATGCGTACCTGCGGTGGCGCAGGAGGT  
GGAAGCCACGGCGTGGGTGTTCCGGGTAAAGGTGTTCCGGGCAAAGGTGTGCCAGGCAAAGGTGTTCCGGGTAAAGGTGTGCCGGGCGT  
CGGGTAAAGGCGTACCAGGTAAGGCGTACCAGGCAAAGGTGTTCCGGGTAAAGGCGTACCAGGTAAGGTGTGCCGGGCGT

GGGTGTTCCGGGTAAAGGTGTTCCGGGCAAAGGTGTGCCAGGCAAAGGTGTTCCGGGTAAAGGTGTGCCGGGTAAAGGCGTA  
 CCGGGTAAAGGCGTACCAGGCAAAGGTGTTCCGGGTAAAGGCGTACCAGGTAAAGGTGTGCCGGGCGTGGGTGTTCCGGGTA  
 AAGGTGTTCCGGGCAAAGGTGTGCCAGGCAAAGGTGTTCCGGGTAAAGGTGTGCCGGGTAAAGGCGTACCAGGTAAGGCGT  
 ACCAGGCAAAGGTGTTCCGGGTAAAGGCGTACCAGGTAAAGGTGTGCCGGGCGTGGGTGTTCCGGGTAAAGGTGTTCCGGGC  
 AAAGGTGTGCCAGGCAAAGGTGTTCCGGGTAAAGGTGTGCCGGGTAAAGGCGTACCAGGTAAGGCGTACCAGGCAAAGGTGT  
 TCCGGGTAAAGGCGTACCAGGTAAAGGTGTGCCGGGCGCGCCA

## Results and Discussion

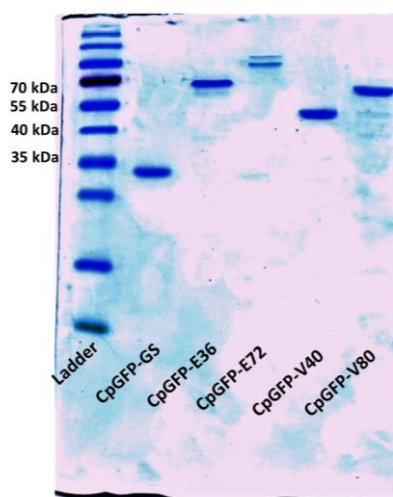

**Figure S1.** Coomassie-stained 15% SDS-PAGE characterization of GFPs used in this study. The mobility varies between similar molecular weights due to the highly charged nature of the ELPs.

**Table S1.** Expected molar mass of different GFP variants.

|                          | GFP-GS   | GFP-E36  | GFP-E72  | GFP-V40  |
|--------------------------|----------|----------|----------|----------|
| Expected molar mass (Da) | 29467.05 | 46925.86 | 64384.67 | 45846.48 |

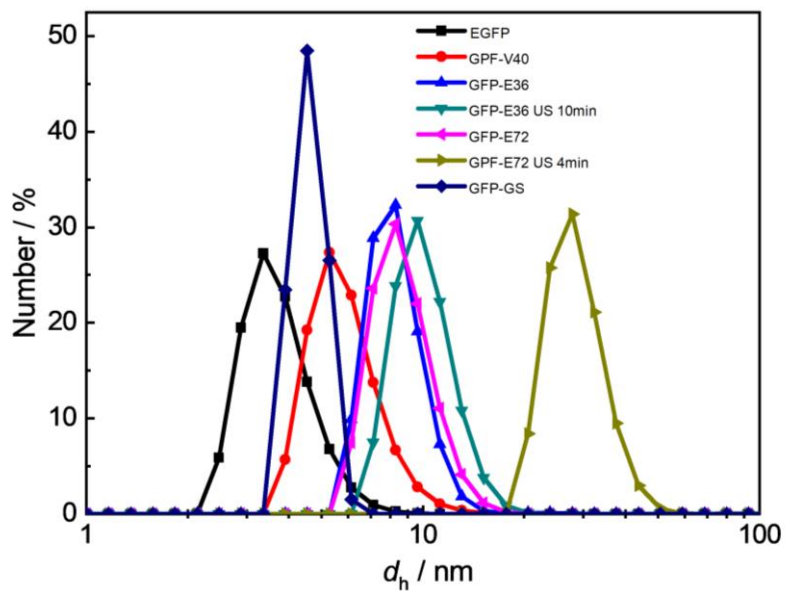

**Figure S2.** DLS analysis of different variants of GFP, where  $d_h$  is hydrodynamic diameter. All the protein samples were purified by size exclusion chromatography (Superdex 200 10/300 GL) before DLS measurements to remove aggregates. Buffer was exchanged to PBS buffer (pH = 7.4) during SEC and protein concentrations were in the 10  $\mu$ M range.

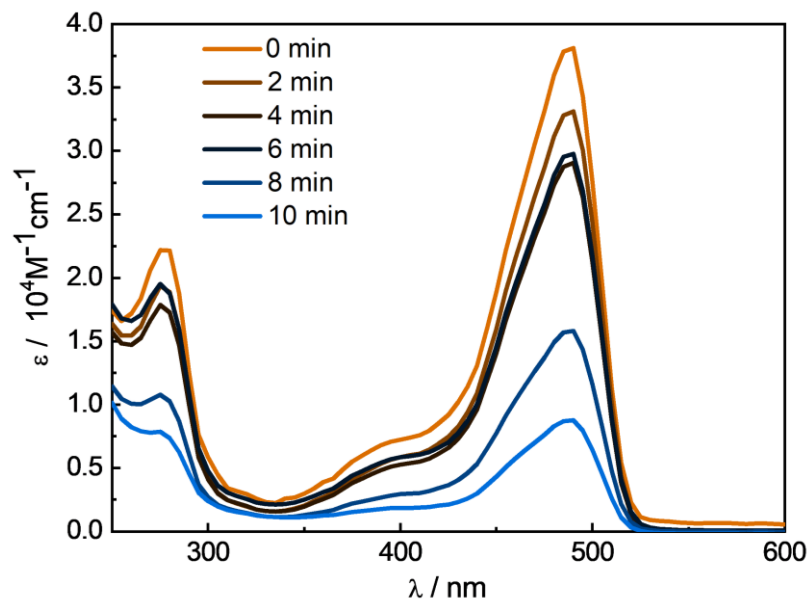

**Figure S3.** UV-vis absorption spectra of EGFP for different sonication times. The decrease in absorption at 280 nm and 470 nm indicates that ultrasound reduces the concentration of soluble EGFP. The protein sample used in the absorbance spectra was placed in PBS buffer (pH = 7.4) at a concentration of 10  $\mu$ M. All samples were centrifuged to remove precipitates formed during sonication, and supernatants were used for the measurements. The spectra were obtained at room temperature.



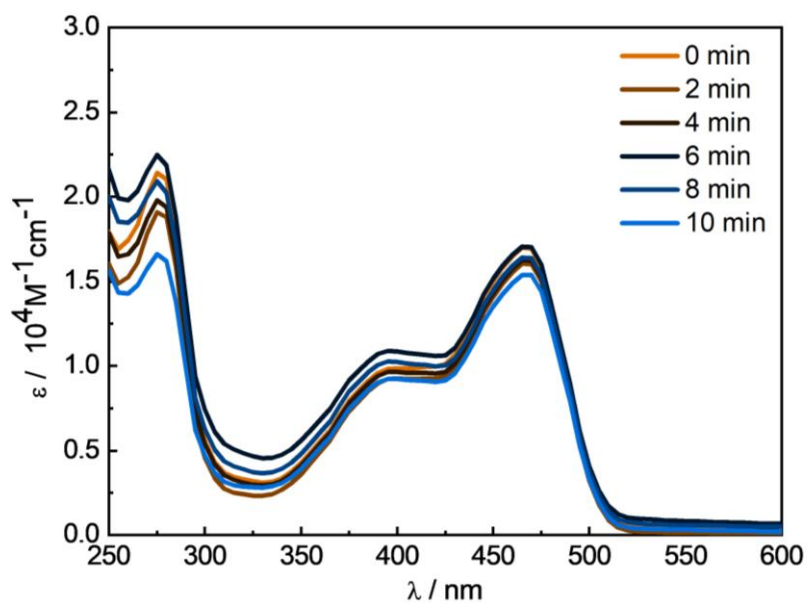

**Figure S4.** UV-vis absorption spectra of GFP-GS for different sonication times, showing relative little change. Samples were processed similar as EGFP in Fig. S3, and spectra were obtained in PBS buffer (pH = 7.4) at room temperature.

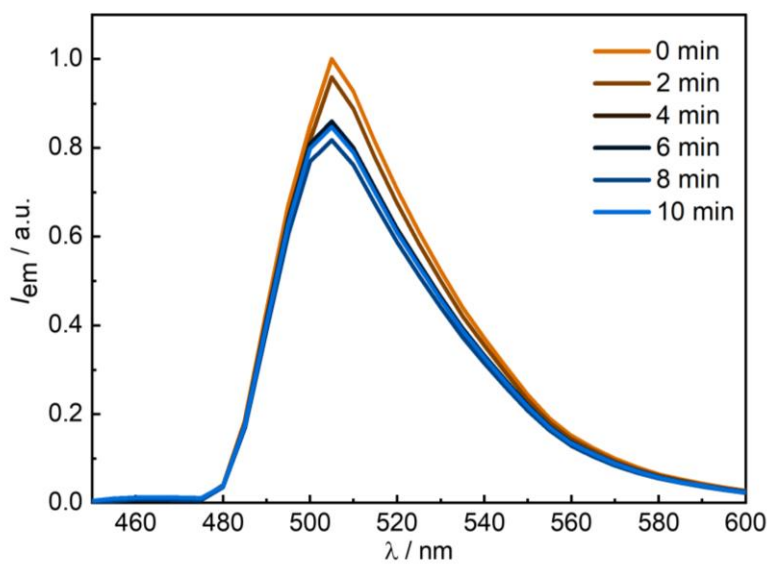

**Figure S5.** Fluorescence emission spectra of GFP-GS for different sonication times. GFP-GS showed more than 85% fluorescence after 10 min continuous sonication, suggesting that GFP-GS exhibits a relatively stable scaffold against ultrasound. Spectra were obtained with excitation at 468 nm in PBS buffer (pH = 7.4) at room temperature and normalized against the fluorescence intensity at 0 min.

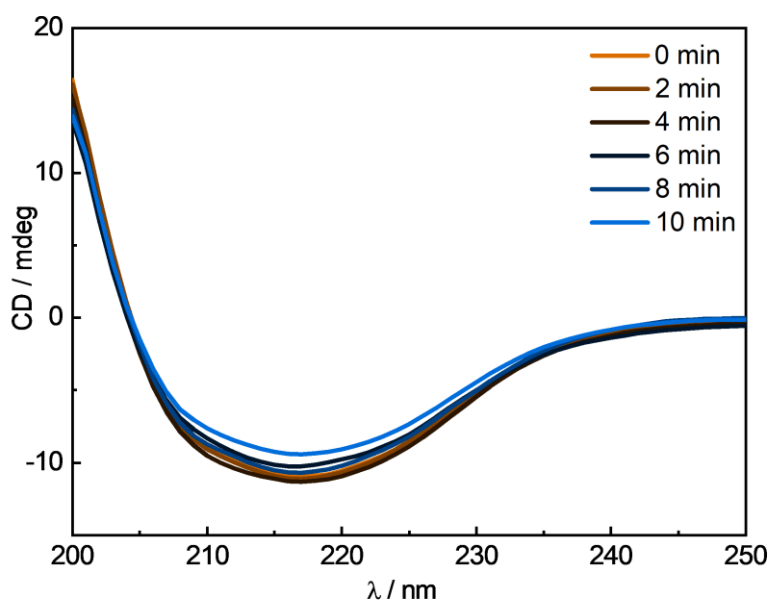

**Figure S6.** CD spectra of GFP-GS for different sonication times. GFP-GS retained its secondary structure after 10 min of continuous sonication. Spectra were obtained in PBS buffer (pH = 7.4) at room temperature with a HT voltage lower than 500 V.

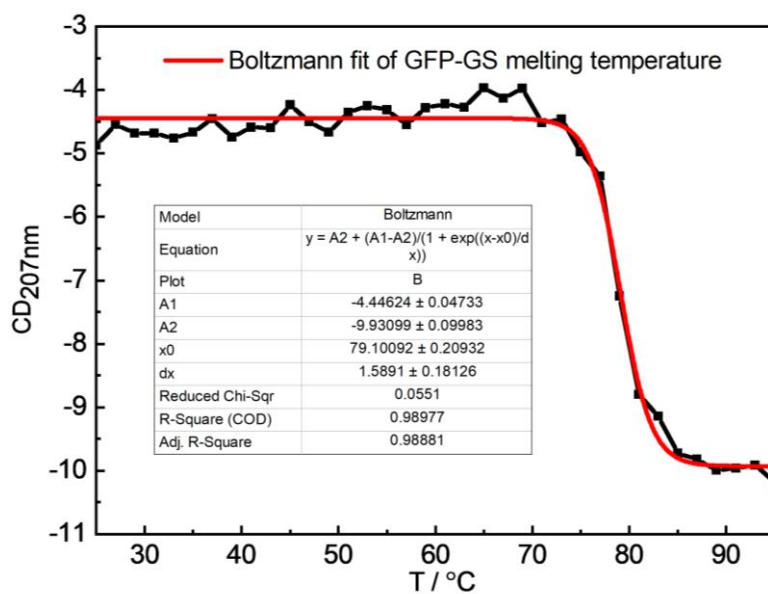

**Figure S7.** GFP-GS melting temperature determination. The melting temperature of GFP-GS was  $78.6 \pm 0.5$  °C, slightly higher than the EGPF melting temperature of 76 °C. Variable-temperature circular dichroism was utilized to analyze GFP-GS melting temperature, and spectra were obtained in PBS buffer (pH = 7.4) at room temperature with a HT voltage lower than 500 V. The CD signal at 207 nm to be the y-axis and plotted versus the temperature. The melting temperature was determined employing a Boltzmann fit in Origin software.

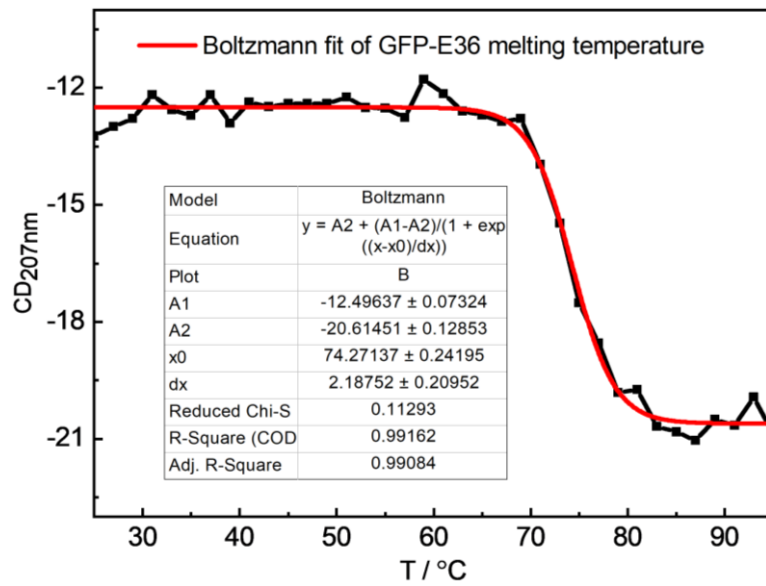

**Figure S8.** GFP-E36 melting temperature determination. The melting temperature of GFP-E36 was  $74.3 \pm 0.8$  °C, a little lower than the EGPF melting temperature of 76 °C published before. Method and conditions as Fig. S7.

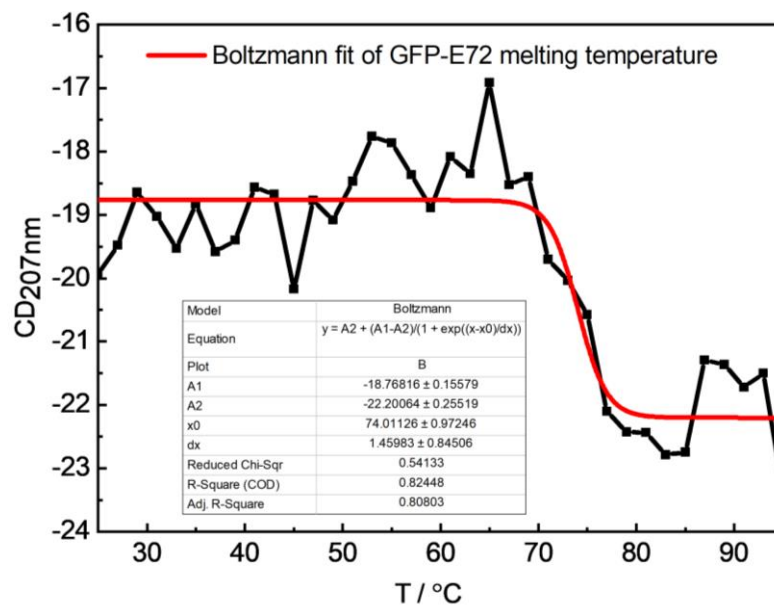

**Figure S9.** GFP-E72 melting temperature determination. The melting temperature of GFP-E72 was  $73.4 \pm 0.6$  °C, a little lower than the GPF melting temperature of 76 °C published before. Method and conditions as Fig. S7.

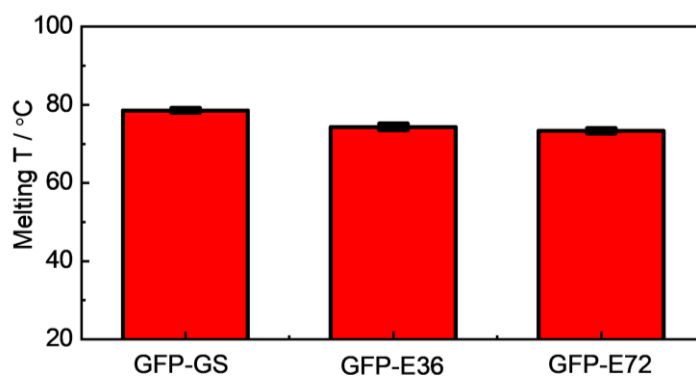

**Figure S10.** Summary of melting temperatures of GFP-GS, GFP-E36, and GFP-E72 as measured by variable-temperature circular dichroism. All experiments were repeated as triplicates and error bars represent standard deviations.

**Table S2.** Melting temperatures of different GFP variants.

| Melting temperature (°C) | 1    | 2    | 3    | Mean value | SD from the mean |
|--------------------------|------|------|------|------------|------------------|
| GFP-GS                   | 79.1 | 78.6 | 78.1 | 78.6       | 0.5              |
| GPF-E36                  | 74.3 | 75.1 | 73.6 | 74.3       | 0.8              |
| GFP-E72                  | 74.0 | 73.2 | 72.9 | 73.4       | 0.6              |

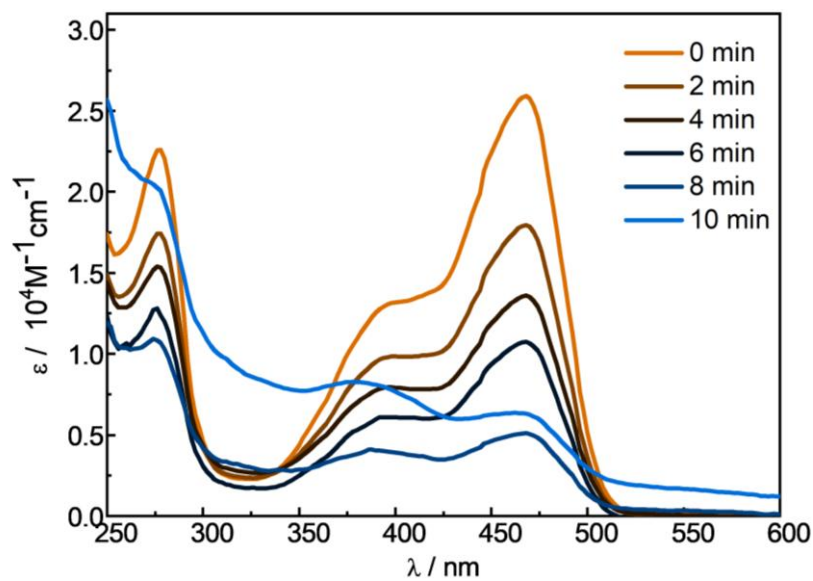

**Figure S11.** UV-vis absorption spectra of GFP-V40 for different sonication times. During sonication GFP-V40 precipitated from solution, similar to EGFP.

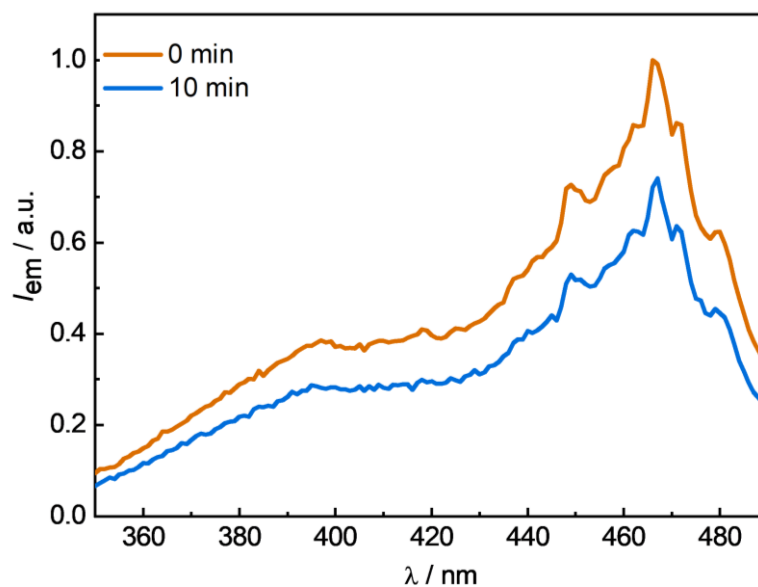

**Figure S12.** Fluorescence excitation spectra of GFP-E36 for different sonication times. The ratio between the bands at 400 nm and 470 nm did not change after 10 min sonication, suggesting that the ratio between protonated and deprotonated chromophores was not affected by sonication. Spectra were obtained with emission at 505 nm in PBS buffer (pH = 7.4) at room temperature and normalized to intensity at 0 min.

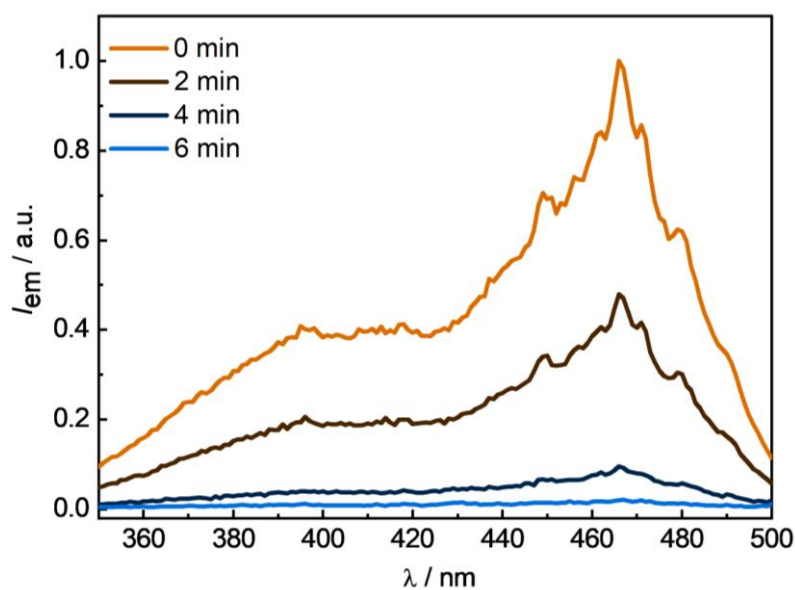

**Figure S13.** Fluorescence excitation spectra of GFP-E72 for different sonication times. Spectra were obtained with emission at 505 nm in PBS buffer (pH = 7.4) at room temperature and normalized to intensity at 0 min.

**Table S3.** Fluorescence quantum yields of different GFP variants.

|                                           | EGFP | GFP-GS | GFP-E36 | GFP-E72 | GFP-V40 |
|-------------------------------------------|------|--------|---------|---------|---------|
| Fluorescence quantum yield <sup>[a]</sup> | 0.60 | 0.44   | 0.47    | 0.33    | 0.34    |

[a] Fluorescence quantum yield was calculated with  $\gamma = Y_{ref} \times \frac{F_{ref}}{F} \times \frac{A}{A_{ref}}$ , in which

$Y$  = Fluorescence quantum yield of the protein of interest,  $Y_{ref}$  = Fluorescence quantum yield of reference protein (GFP),  $F$  = Integrated fluorescence,  $F_{ref}$  = Reference integrated fluorescence,  $A$  = Absorbance,  $A_{ref}$  = Reference absorbance.

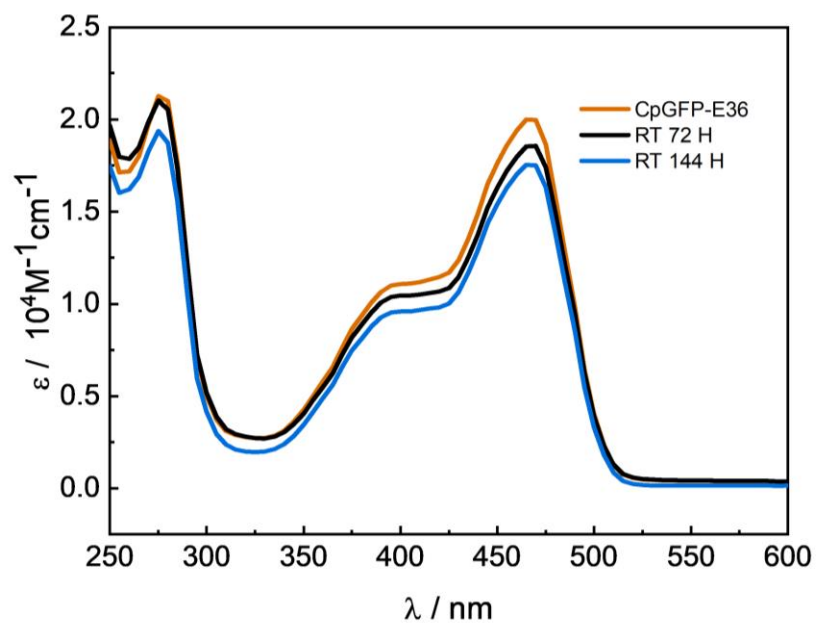

**Figure S14.** UV-vis absorption spectra of GFP-E36 incubated at room temperature for up to 144 h.

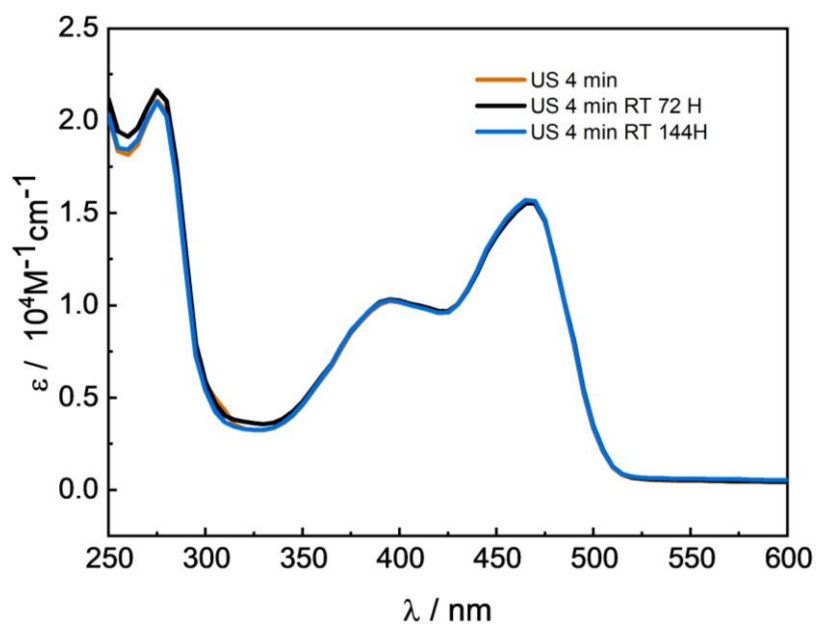

**Figure S15.** UV-vis absorption recovery spectra of GFP-E36 after 4 min ultrasonication and incubation at room temperature.

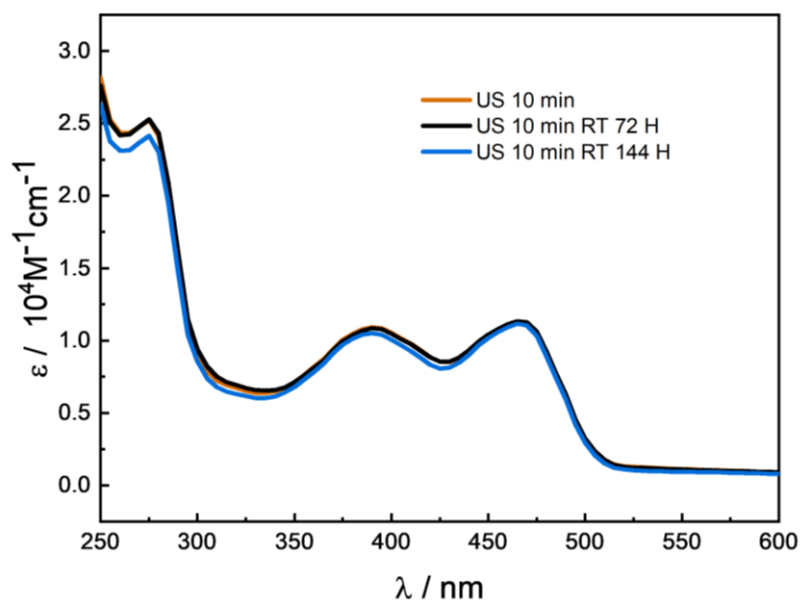

**Figure S16.** UV-vis absorption recovery spectra of GFP-E36 after 10 min ultrasonication and incubation at room temperature.

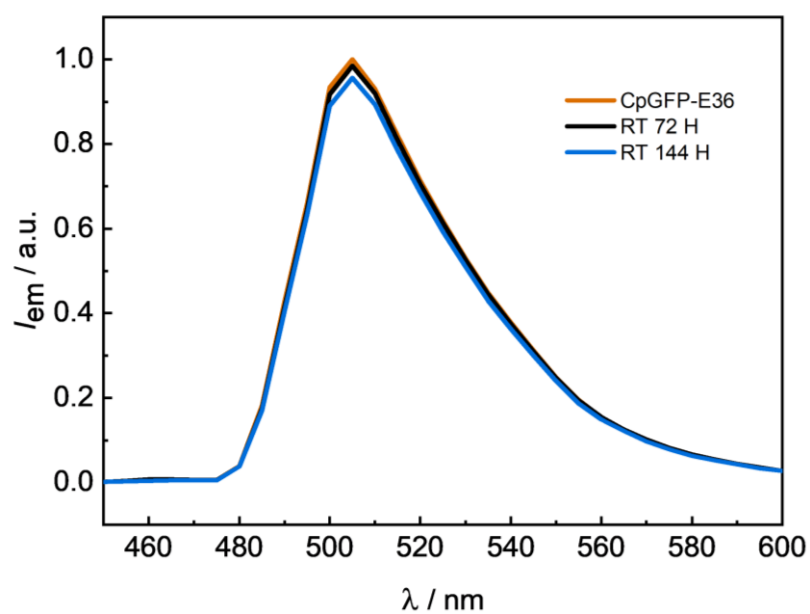

**Figure S17.** Fluorescence emission spectra of GFP-E36 incubated at room temperature. Spectra were obtained with excitation at 468 nm in PBS buffer (pH = 7.4) at room temperature and normalized against the fluorescence intensity of 10  $\mu\text{M}$  GFP-E36 without sonication.

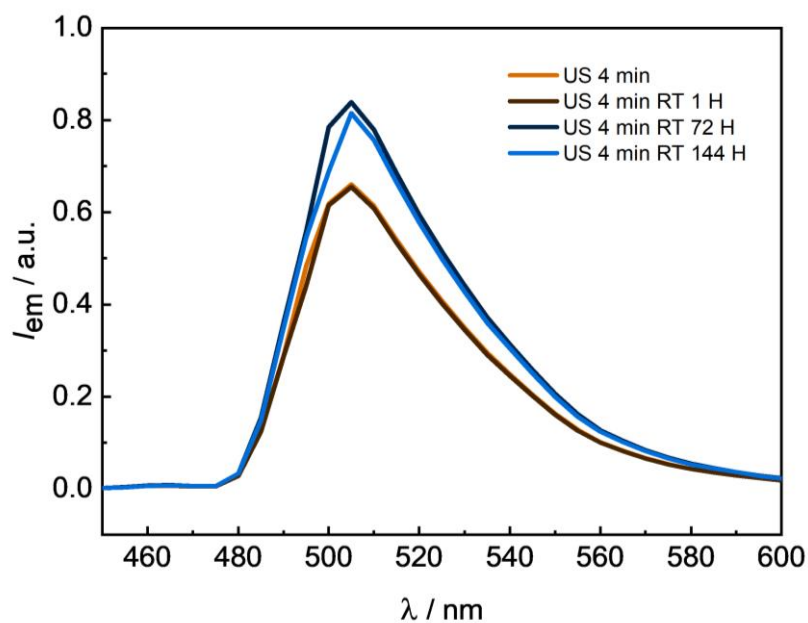

**Figure S18.** Fluorescence emission spectra of GFP-E36 after 4 min sonication and subsequently incubated at room temperature. Spectra were obtained with excitation at 468 nm in PBS buffer (pH = 7.4) at room temperature and normalized against the fluorescence intensity of 10  $\mu$ M GFP-E36 without sonication.

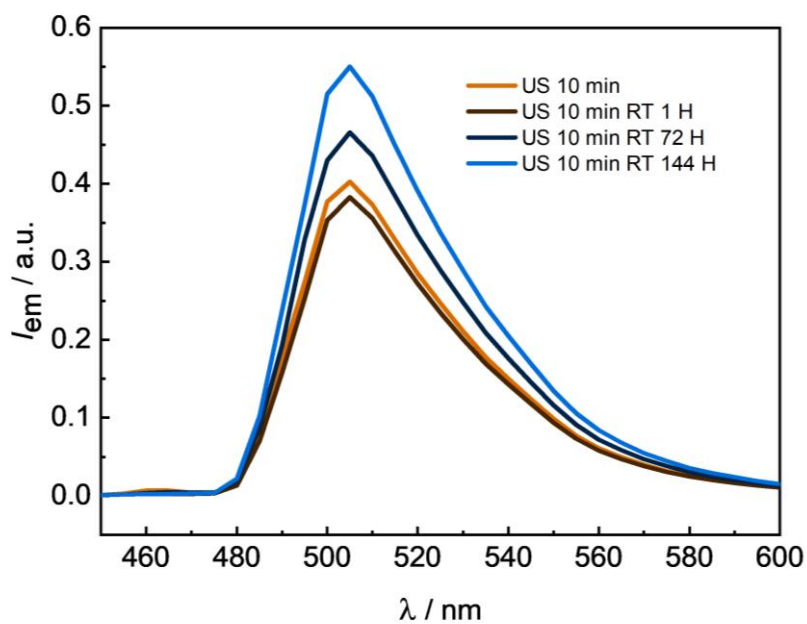

**Figure S19.** Fluorescence emission spectra of GFP-E36 after 10 min sonication and incubated at room temperature. Spectra were obtained with excitation at 468 nm in PBS buffer (pH = 7.4) at room temperature and normalized against the fluorescence intensity of 10  $\mu$ M GFP-E36 without sonication.



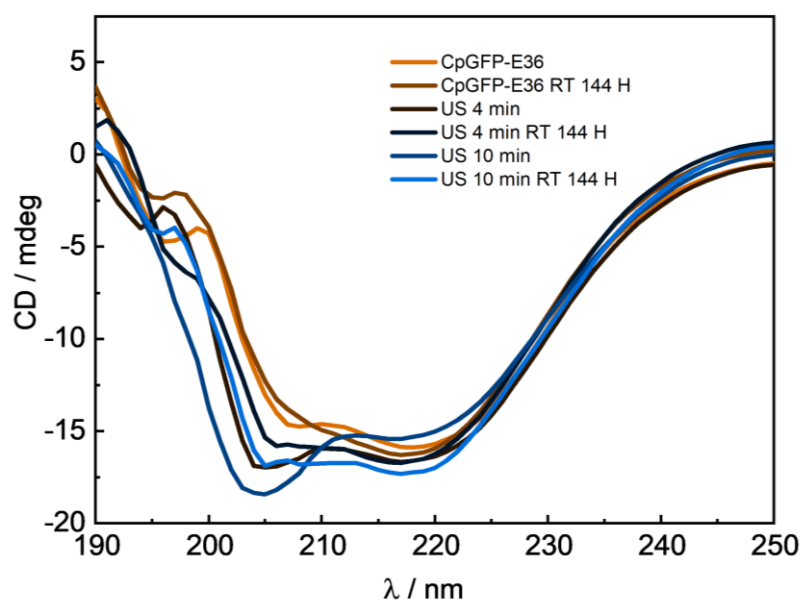

**Figure S20.** CD recovery spectra of GFP-E36 after ultrasonication and incubated at room temperature. GFP-E36 recovered part of its secondary structure after 144 h incubation. Spectra were obtained in PBS buffer (pH = 7.4) at room temperature with a HT voltage lower than 500 V.

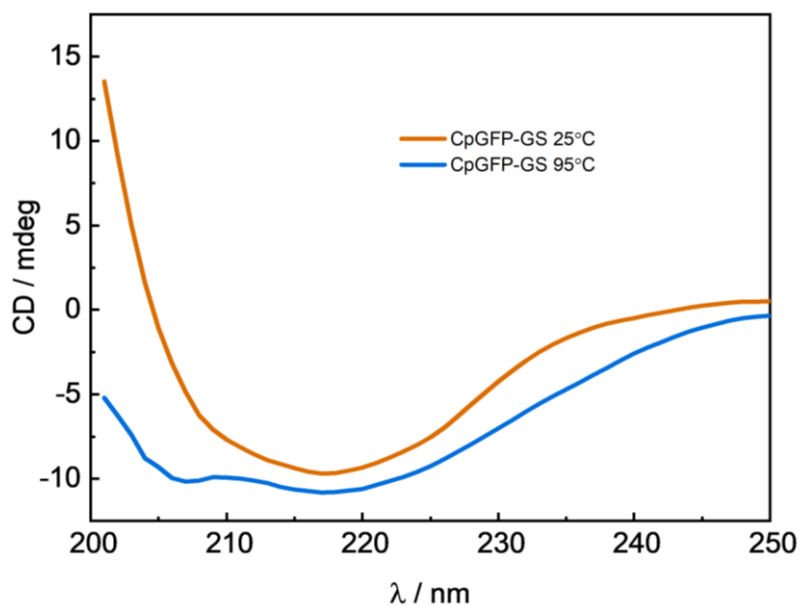

**Figure S21.** CD spectra of GFP-GS at 25 °C and 95 °C. Spectra were obtained in PBS buffer (pH = 7.4) at room temperature with a HT voltage lower than 500 V.

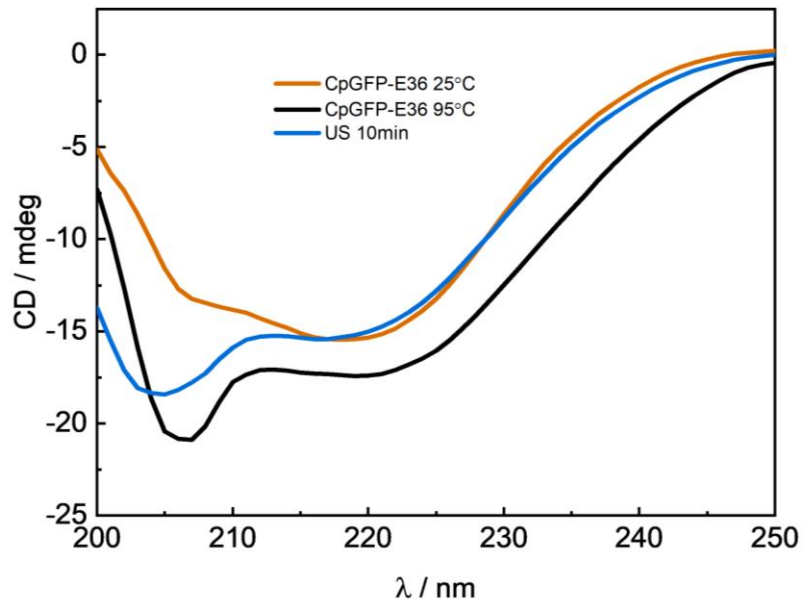

**Figure S22.** CD spectra of GFP-E36 at 25 °C, 95 °C, and after 10 min sonication. Sonication induced unfolding is different from temperature. Spectra were obtained in PBS buffer (pH = 7.4) at room temperature with a HT voltage lower than 500 V.

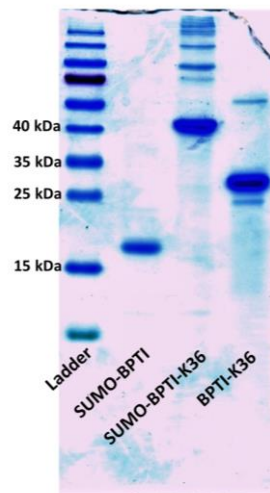

**Figure S23.** Coomassie-stained 15% SDS-PAGE characterization of BPTIs used in this work. The bands above the major product are most likely dimers or oligomeric forms of BPTI.

**Table S4.** Expected molar mass of different BPTI variants.

|                               | SUMO-BPTI | SUMO-BPTI-K36 | BPTI-K36 |
|-------------------------------|-----------|---------------|----------|
| Expected molecular weight(Da) | 19679.21  | 37104.13      | 24906.42 |

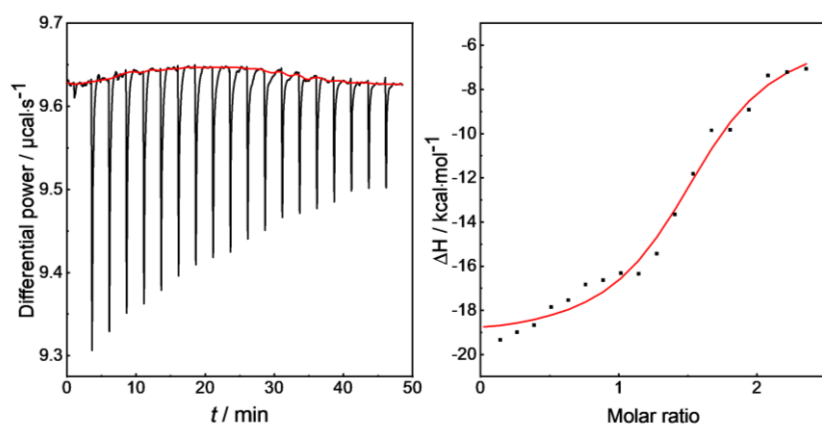

**Figure S24.** ITC characterization of SUMO-BPTI-K36 binding affinity with trypsin. The binding constant  $K_D$  between SUMO-BPTI-K36 and trypsin is  $5.44 \pm 0.39 \times 10^{-7}$  M. Results were obtained in PBS buffer (pH = 7.4), the trypsin concentration in the bath was  $8 \mu\text{M}$ , and the SUMO-BPTI-K36 concentration in the syringe was  $100 \mu\text{M}$ . All experiments were repeated as triplicates.

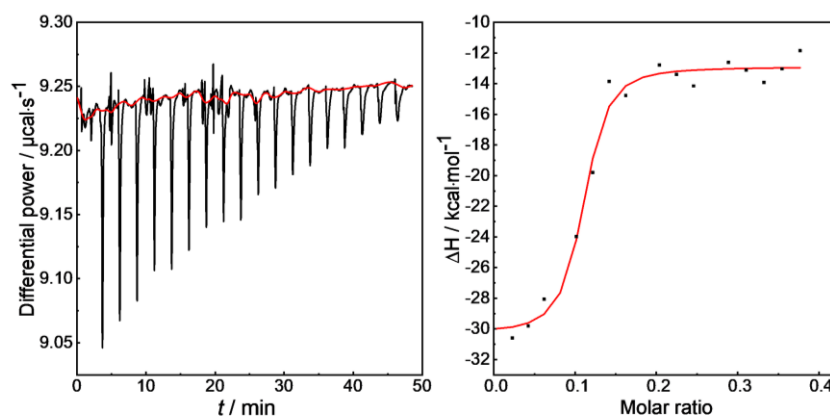

**Figure S25.** ITC characterization of BPTI-K36 binding affinity with trypsin. The binding constant  $K_D$  between BPTI-K36 and trypsin is  $4.53 \pm 0.42 \times 10^{-8}$  M. Results were obtained in PBS buffer (pH = 7.4), the trypsin concentration in the bath was  $20 \mu\text{M}$  and the BPTI-K36 concentration in the syringe was  $40 \mu\text{M}$ . All experiments were repeated as triplicates.

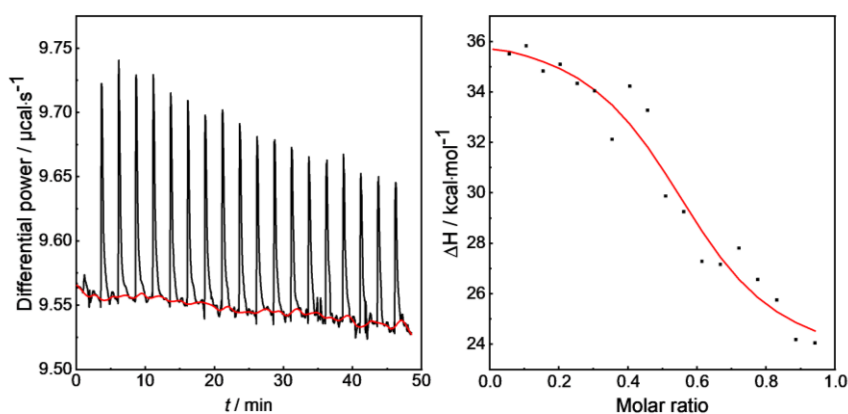

**Figure S26.** ITC characterization of SUMO-BPTI binding affinity with trypsin. The binding constant  $K_D$  between SUMO-BPTI and trypsin is  $3.70 \pm 0.53 \times 10^{-7}$  M. Results were obtained in PBS buffer (pH = 7.4), the trypsin concentration in the bath was  $8 \mu\text{M}$  and the BPTI-K36 concentration in the syringe was  $100 \mu\text{M}$ . All experiments were repeated as triplicates.

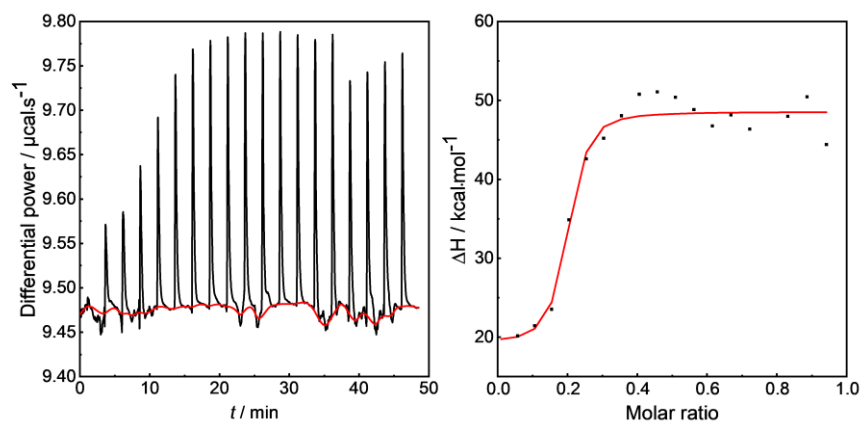

**Figure S27.** ITC characterization of BPTI binding affinity with trypsin. The binding constant  $K_D$  between BPTI and trypsin is  $4.14 \pm 0.13 \times 10^{-8}$  M. Results were obtained in PBS buffer (pH = 7.4), the trypsin concentration in the bath was 10  $\mu$ M, and the BPTI concentration in the syringe was 50  $\mu$ M. All experiments were repeated as triplicates.

**Table S5.** Dissociation constants ( $K_D$ ) of different BPTI variants.

| Dissociation constant $K_D$ (M) | 1                     | 2                     | 3                     | Mean value            | SD from the mean      |
|---------------------------------|-----------------------|-----------------------|-----------------------|-----------------------|-----------------------|
| SUMO-BPTI                       | $3.75 \times 10^{-7}$ | $3.15 \times 10^{-7}$ | $4.2 \times 10^{-7}$  | $3.70 \times 10^{-7}$ | $0.53 \times 10^{-7}$ |
| BPTI                            | $4.03 \times 10^{-8}$ | $4.1 \times 10^{-8}$  | $4.28 \times 10^{-8}$ | $4.14 \times 10^{-8}$ | $0.13 \times 10^{-8}$ |
| SUMO-BPTI-K36                   | $5.35 \times 10^{-7}$ | $5.87 \times 10^{-7}$ | $5.1 \times 10^{-7}$  | $5.44 \times 10^{-7}$ | $0.39 \times 10^{-7}$ |
| BPTI-K36                        | $4.13 \times 10^{-8}$ | $4.5 \times 10^{-8}$  | $4.97 \times 10^{-8}$ | $4.53 \times 10^{-8}$ | $0.42 \times 10^{-8}$ |

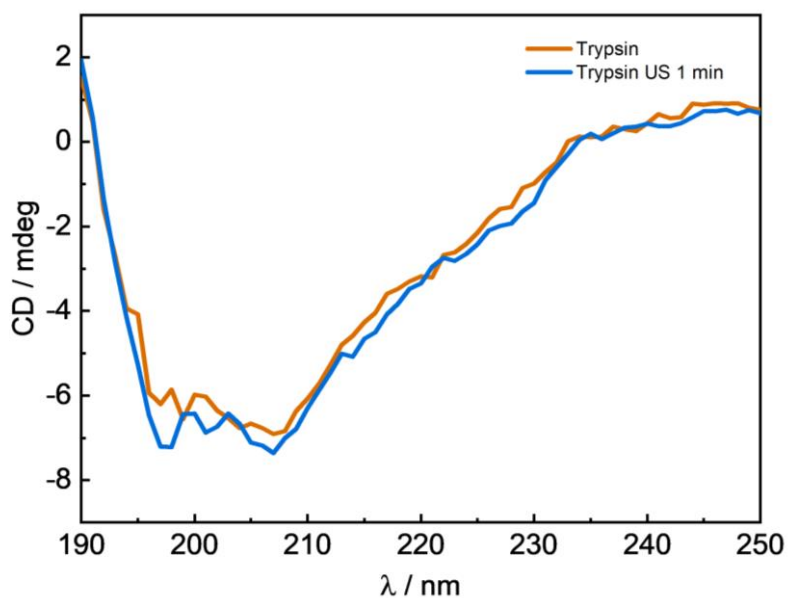

**Figure S28.** CD spectra of trypsin after 1 min sonication. Spectra were obtained using 0.5 mg/mL trypsin in PBS buffer (pH = 7.4) at room temperature with a HT voltage lower than 500 V.

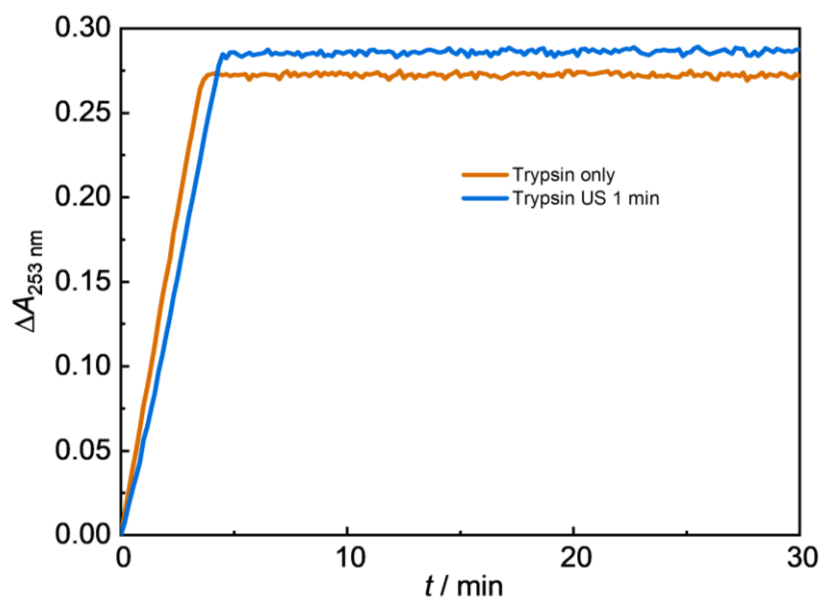

**Figure S29.** Trypsin remained at about 80% activity after 1 min sonication according to the enzymatic reactions using BAEE as substrate.

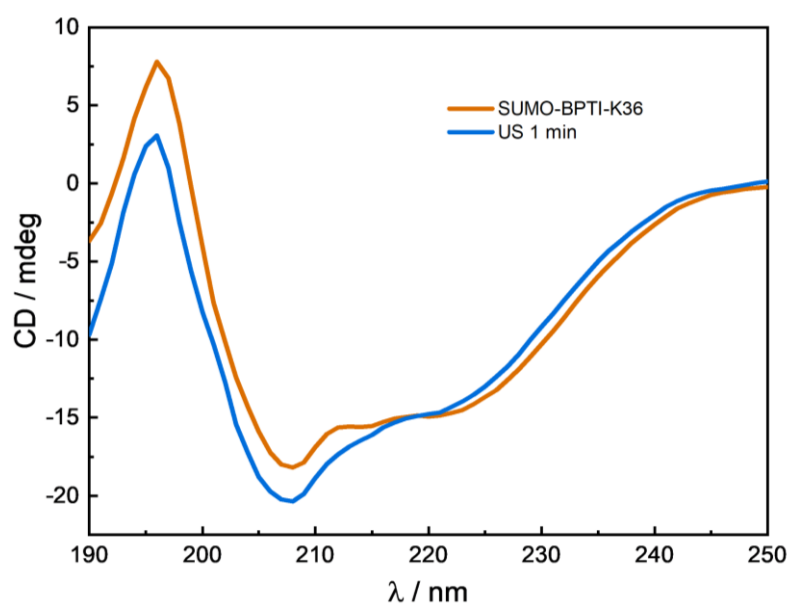

**Figure S30.** CD spectra of 50  $\mu$ M SUMO-BPTI-K36 after 1 min sonication. Spectra were obtained in PBS buffer (pH = 7.4) at room temperature with a HT voltage lower than 500 V.

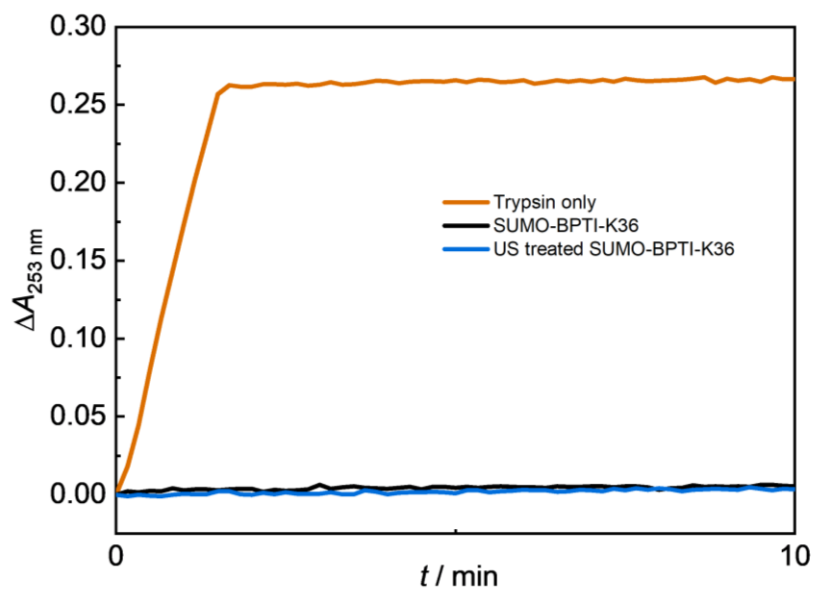

**Figure S31.** US treated SUMO-BPTI-K36 after 1 min still can inhibit trypsin (molar ratio between enzyme and inhibitor is 1:4) thoroughly according to the enzymatic reactions using BAEE as substrate.

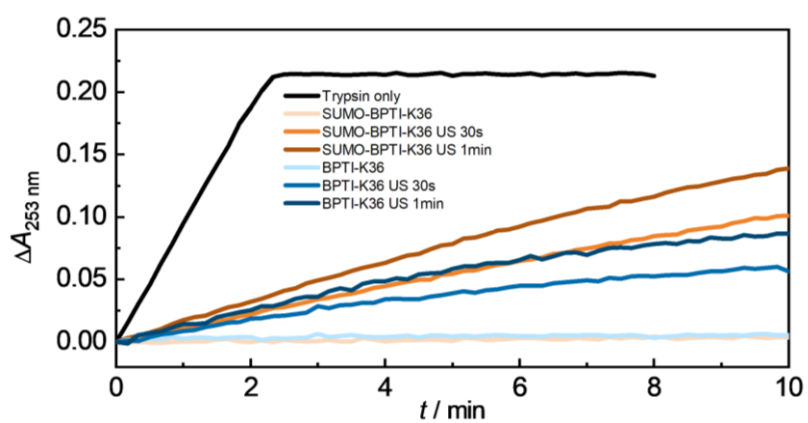

**Figure S32.** The K36 tail, and not the SUMO tag, plays an essential role in the ultrasound sensitivity of the trypsin-BPTI complexes. In the enzymatic reactions using BAEE as substrate, the BPTI-K36 blocks trypsin completely. The trypsin-BPTI-K36 complex is disassembled by ultrasound within seconds the same as SUMO-BPTI-K36. Conditions are as described in Figure 3.

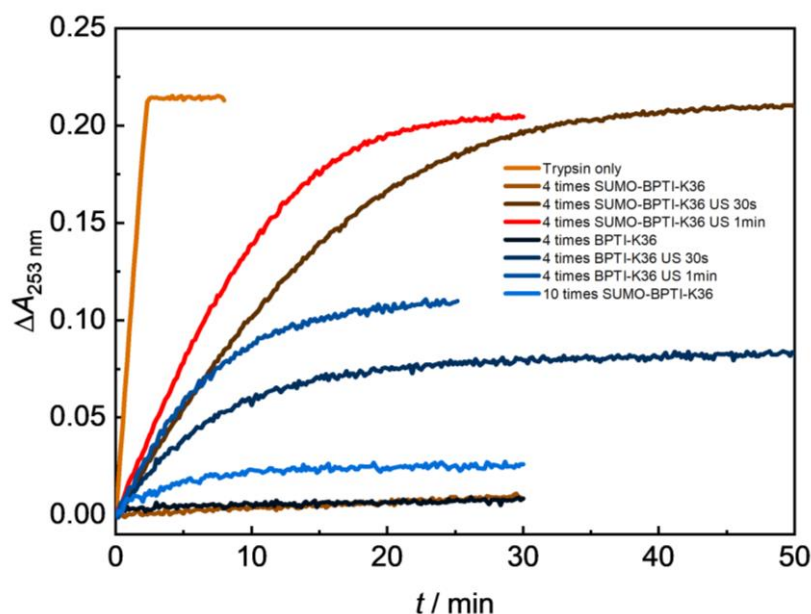

**Figure S33.** The enzymatic activity of trypsin, trypsin-SUMO-BPTI-K36, and trypsin-BPTI-K36 complexes for longer times of sonication. Trypsin-BPTI-K36 complexes showed lower conversion percentages because of BPTI-K36 has higher binding affinity. Also, higher trypsin inhibitors ratio of 1:10 was investigated to further elucidate the rebinding mechanism, showing that dynamic rebinding of an excess inhibitor reduces enzymatic activity.

## References

- [1] Kolbe, A.; del Mercato, L. L.; Abbasi, A. Z.; Rivera Gil, P.; Gorzini, S. J.; Huibers, W. H.; Poolman, B.; Parak, W. J.; Herrmann, A., De novo design of supercharged, unfolded protein polymers, and their assembly into supramolecular aggregates. *Macromol. Rapid Commun.* **2011**, *32* (2), 186-190.
- [2] McDaniel, J. R.; Mackay, J. A.; Quiroz, F. G.; Chilkoti, A., Recursive directional ligation by plasmid reconstruction allows rapid and seamless cloning of oligomeric genes. *Biomacromolecules* **2010**, *11* (4), 944-952.
- [3] Novagen **2004**. Competent cells user protocol. Novagen, Darmstadt, Germany.
- [4] (a) Cabantous, S.; Terwilliger, T. C.; Waldo, G. S., Protein tagging and detection with engineered self-assembling fragments of green fluorescent protein. *Nat. Biotechnol.* **2005**, *23* (1), 102-107; (b) Pedelacq, J. D.; Cabantous, S.; Tran, T.; Terwilliger, T. C.; Waldo, G. S., Engineering and characterization of a superfolder green fluorescent protein. *Nat. Biotechnol.* **2006**, *24* (1), 79-88.
- [5] Sun, Z.; Lu, W.; Jiang, A.; Chen, J.; Tang, F.; Liu, J. N., Expression, purification and characterization of aprotinin and a human analogue of aprotinin. *Protein Expr. Purif.* **2009**, *65* (2), 238-243.

## Author Contributions

A.H. and Y.Z. designed the study. Y.Z. performed all experiments. S.H. and M.L. provided reagents and advice. Y.Z., A.J.B., and R.G. analyzed and interpreted data. Y.Z., R.G., A.J.B., and A.H. designed figures and wrote the manuscript as well as the revision.
